# Supplementary material for: A Novel Four-Gene Prognostic Signature for Prediction of Survival in Patients with Soft Tissue Sarcoma
Source: MDPI journal article supplement (doi:10.3390/cancers13225837), 2021-11-21
Supplement: s1 [file s1]

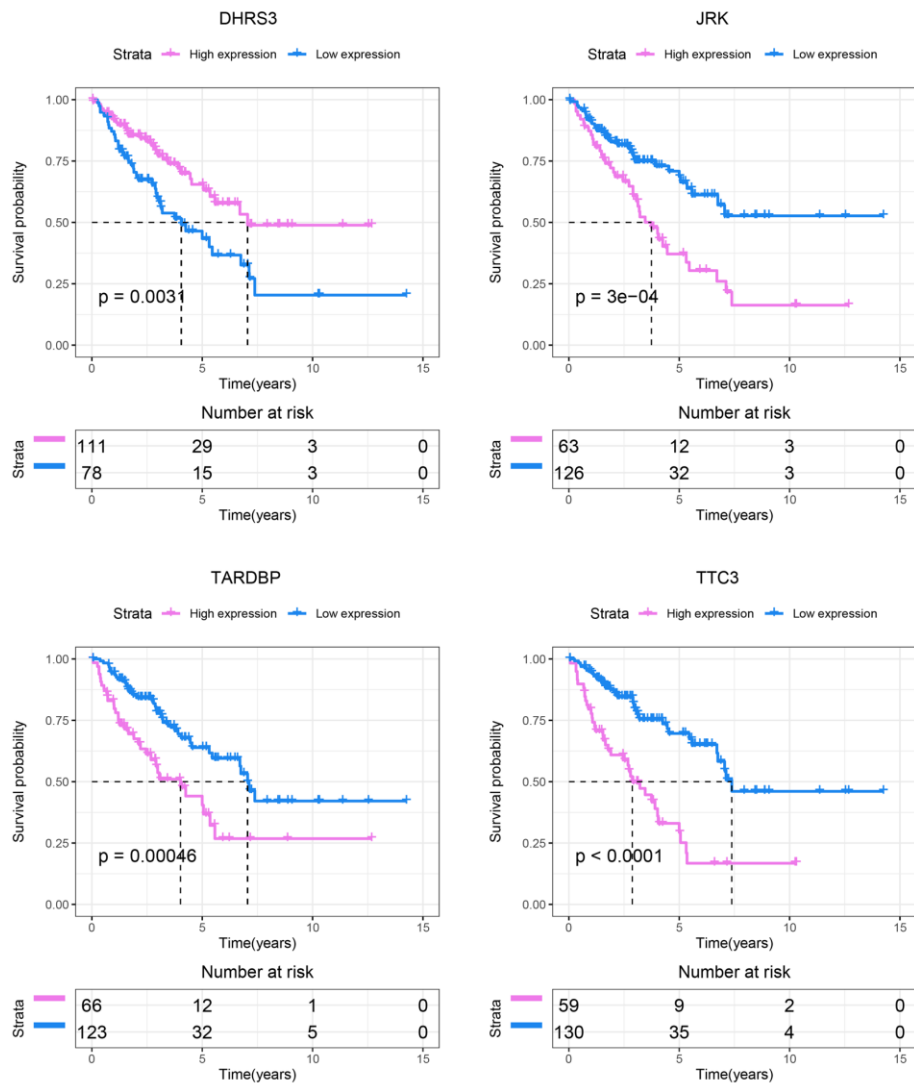

**Supplementary Figure S1. The relationship between the expression levels of these four genes and OS in the whole set of TCGA cohort.**

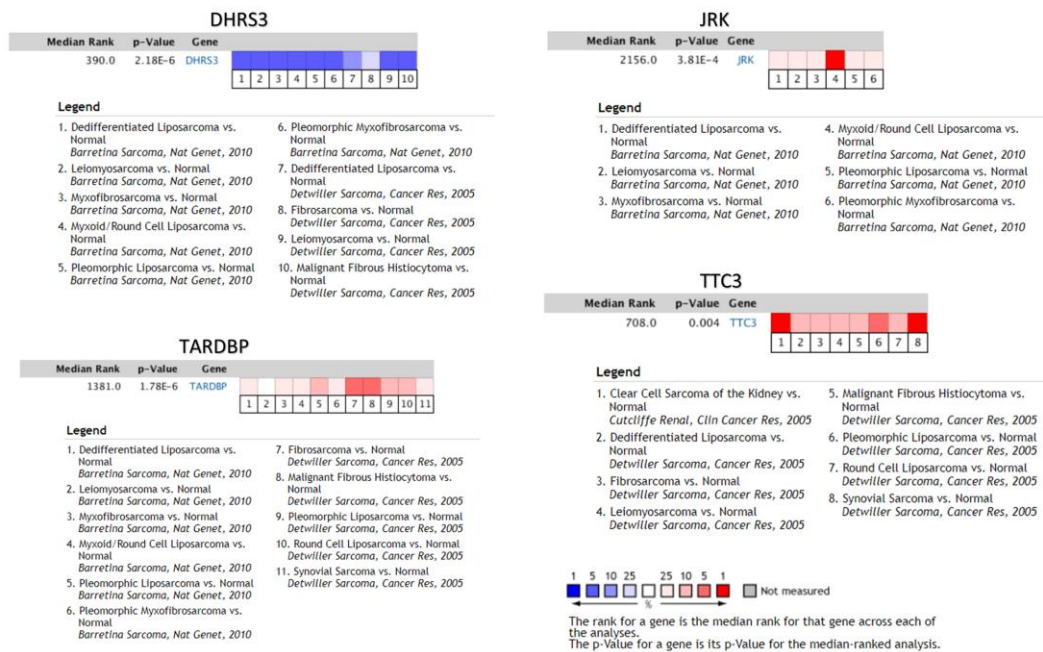

**Supplementary Figure S2. Differences in the expression of DHRS, JRK, TARDBP and TTC3 between STS tissues and normal tissues in Oncomine database.**

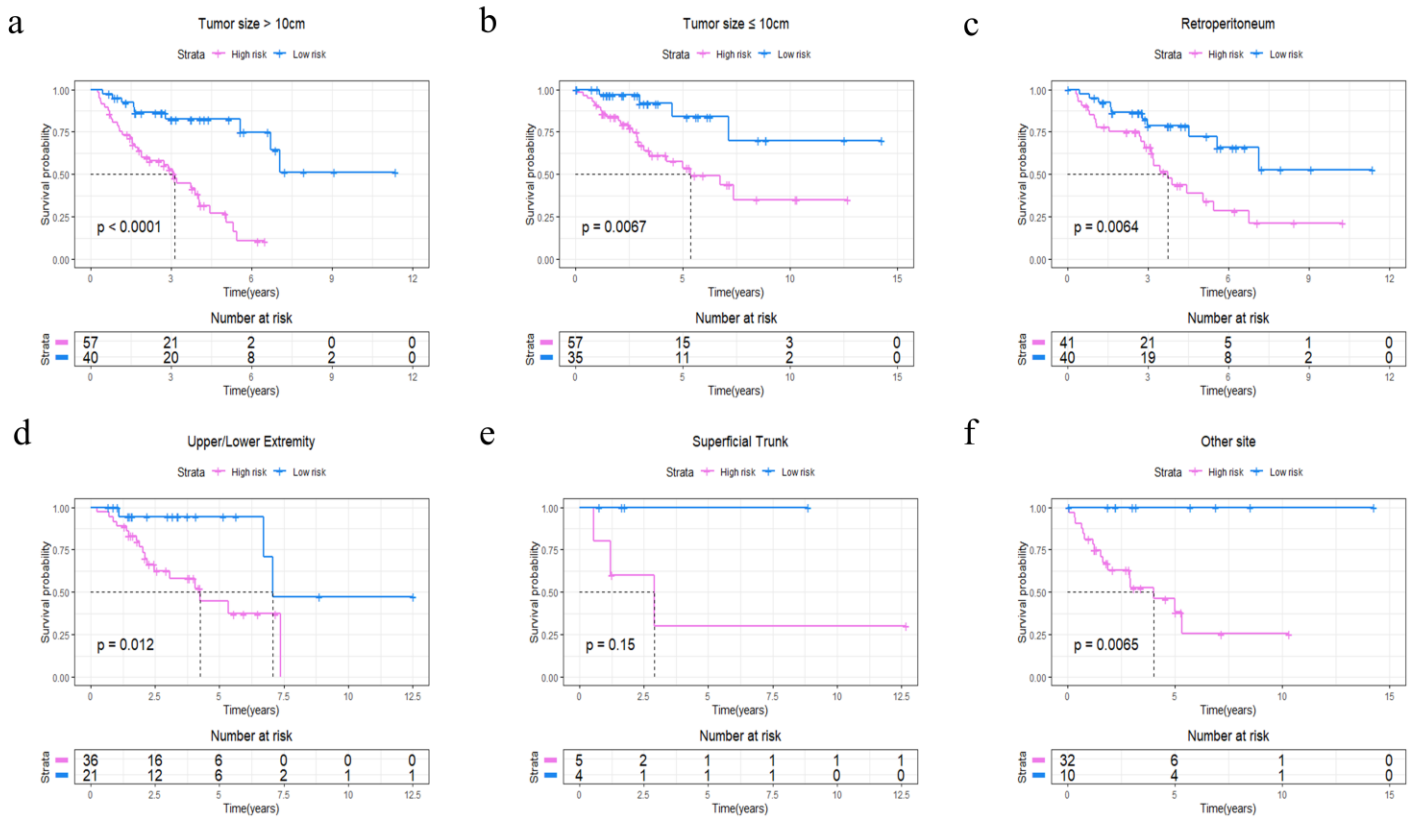

**Supplementary Figure S3. OS analysis of different tumor size groups and tumor site groups based on the risk model in the whole set of TCGA cohort.** Based on the risk score model, stratified OS analysis performed in patients with different tumor size (a,b) and tumor site (c-f) in the whole set of TCGA cohort. Significance for survival analysis was calculated using a log-rank test, with the red line representing the high-risk group and the blue line representing the low-risk group. The grouping of STS samples is shown at the bottom of the charts.

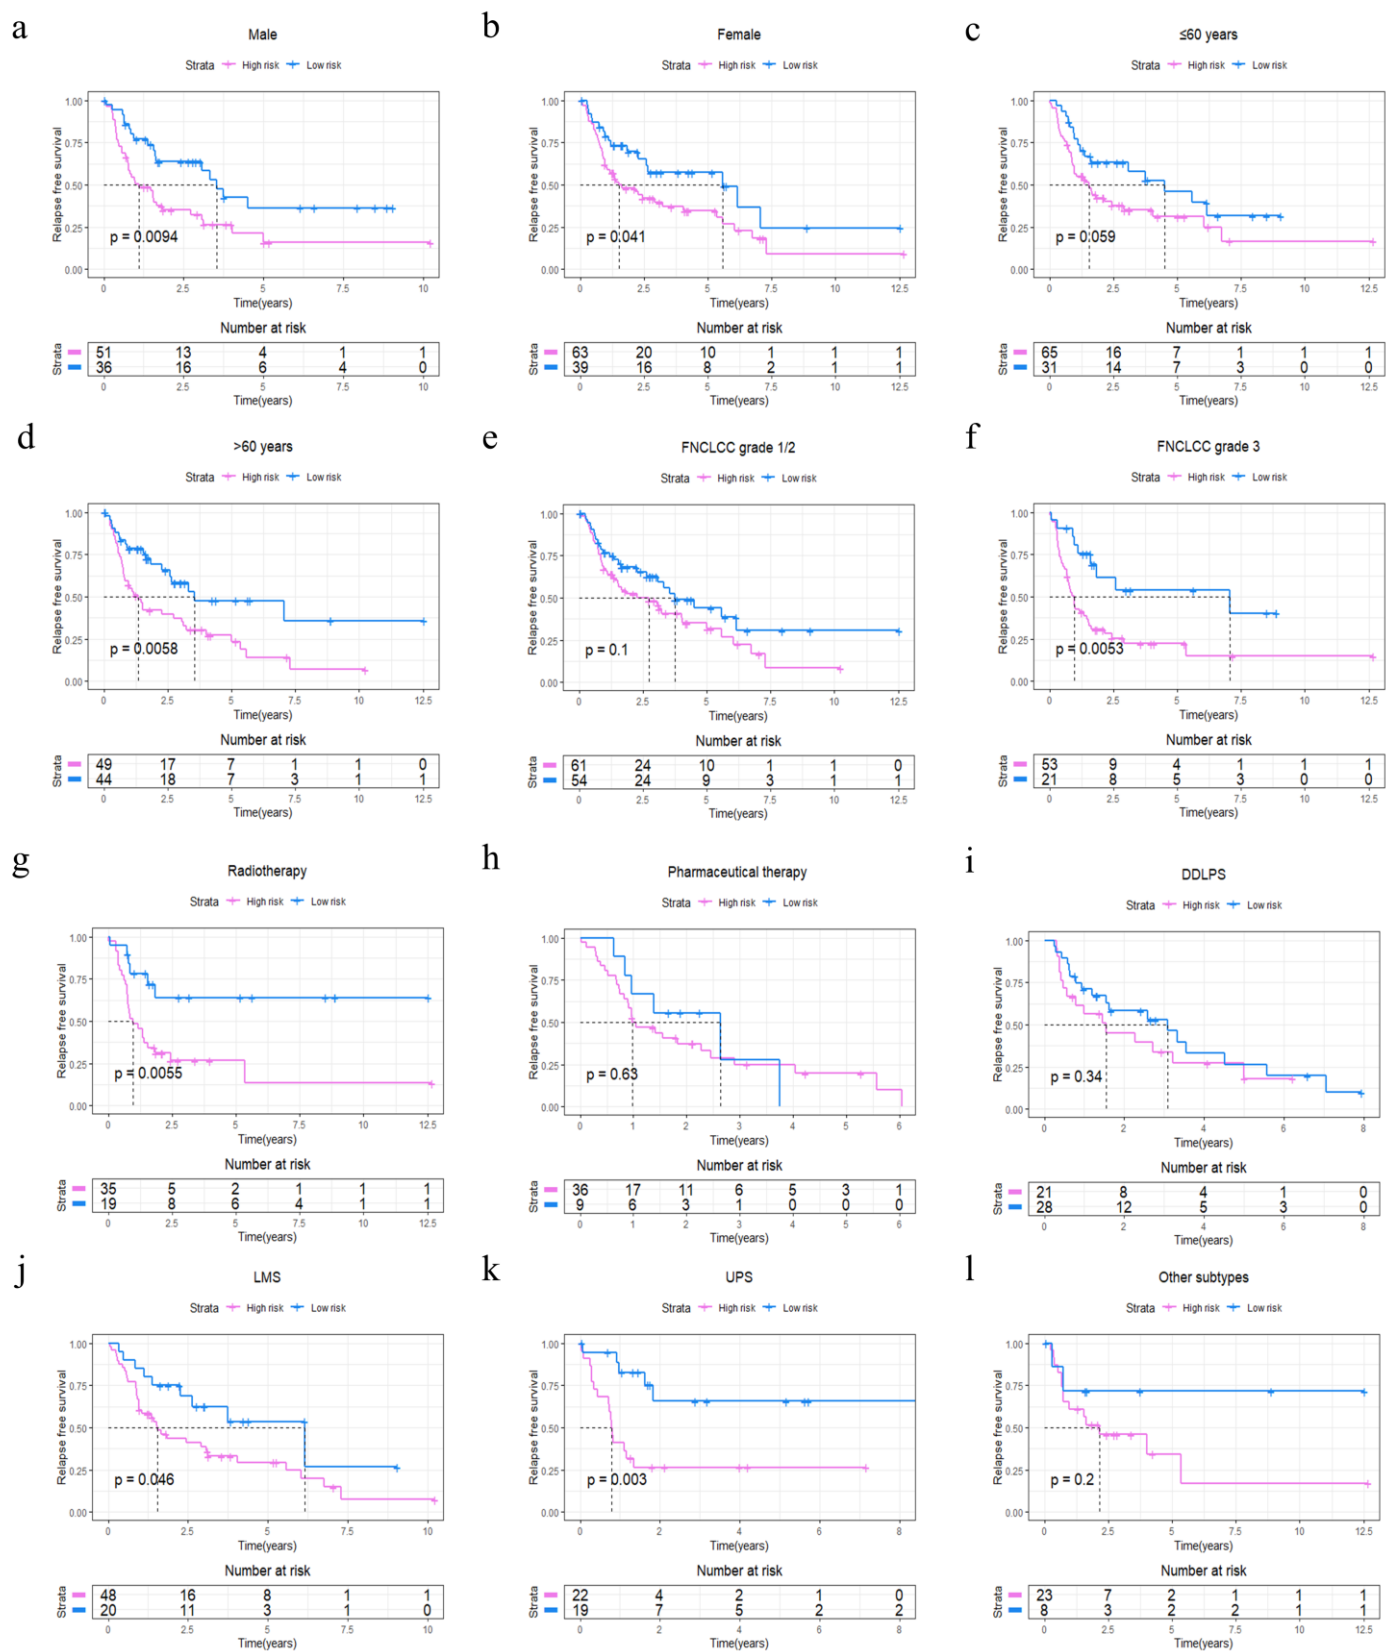

**Supplementary Figure S4. Stratified RFS analysis based on the risk model in the whole set of TCGA cohort.** Based on the risk score model, stratified RFS analysis performed in patients with different clinical parameters, such as gender (**a** and **b**), age

group (c and d), FNCLCC grade (e and f), radiotherapy (g), pharmaceutical therapy (h) and histological type (i-l) in the whole set of TCGA cohort. Significance for survival analysis was calculated using a log-rank test, with the red line representing the high-risk group and the blue line representing the low-risk group. The grouping of STS samples is shown at the bottom of the charts.

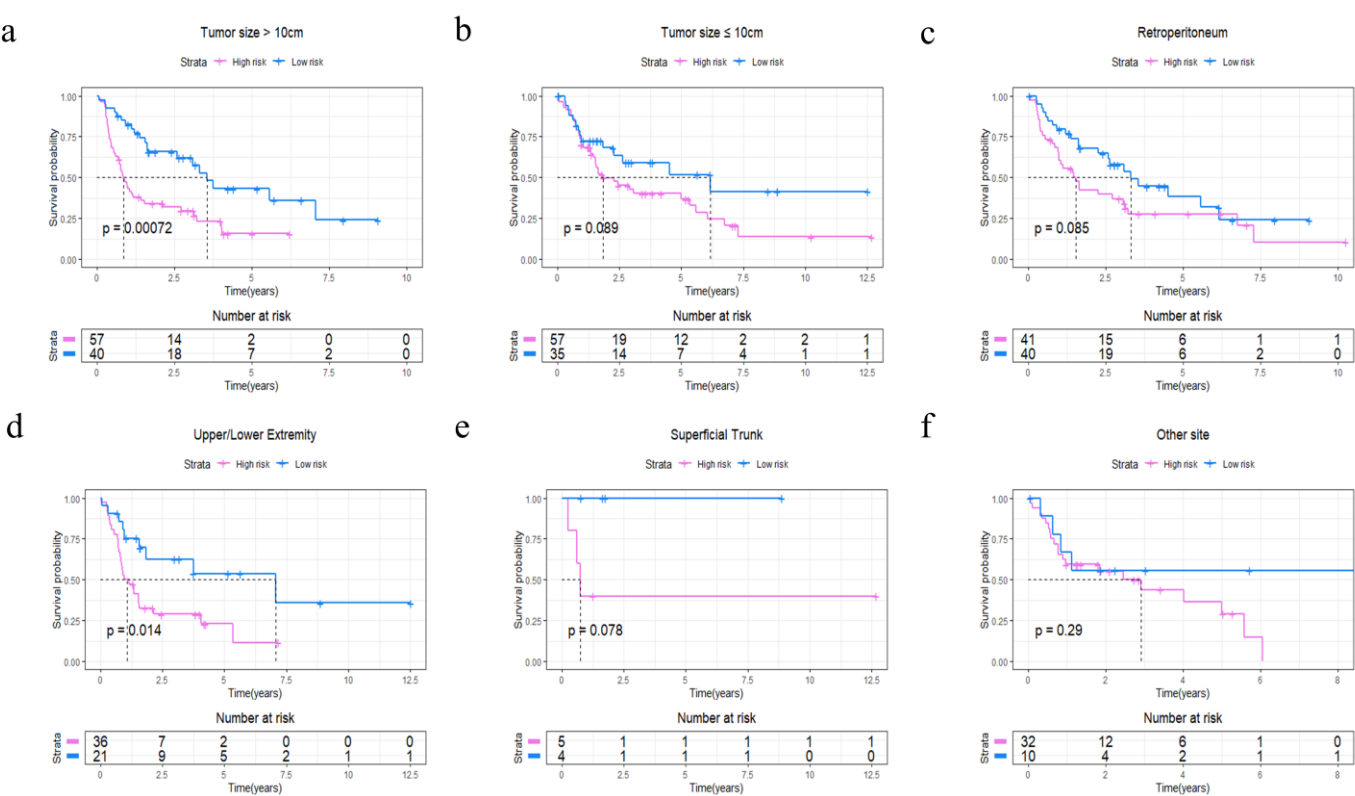

**Supplementary Figure S5. RFS analysis of different tumor size groups and tumor site groups based on the risk model in the whole set of TCGA cohort.** Based on the risk score model, stratified RFS analysis performed in patients with different tumor size (a,b) and tumor site (c-f) in the whole set of TCGA cohort.. Significance for survival analysis was calculated using a log-rank test, with the red line representing the high-risk group and the blue line representing the low-risk group. The grouping of STS samples is shown at the bottom of the charts.

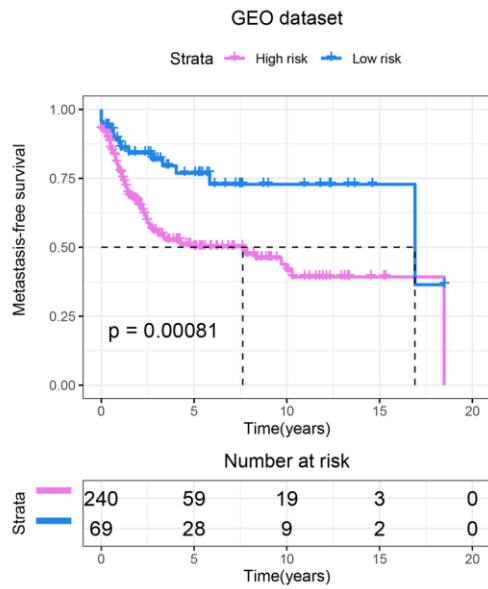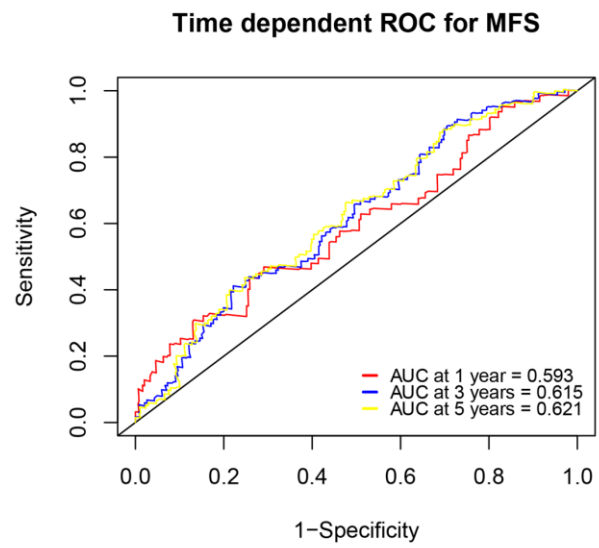

**Supplementary Figure S6. Kaplan–Meier analysis and time-dependent ROC analysis of MFS for the four-gene signature in STS.**

a

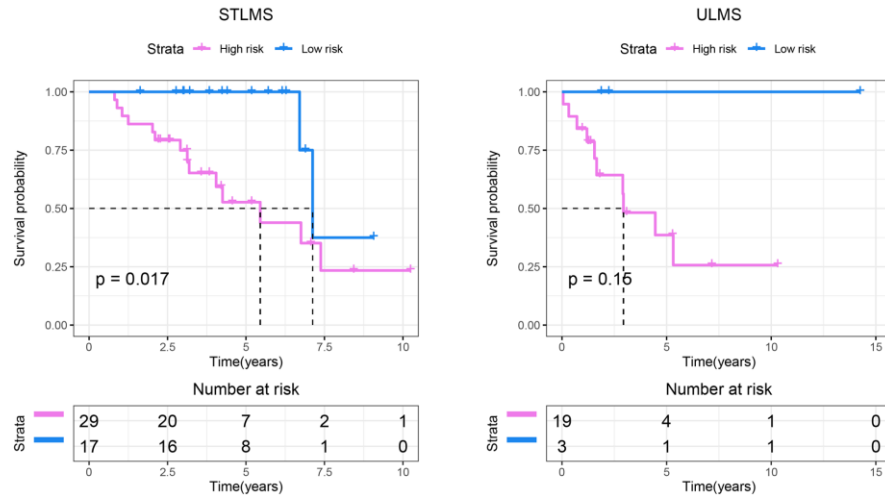

b

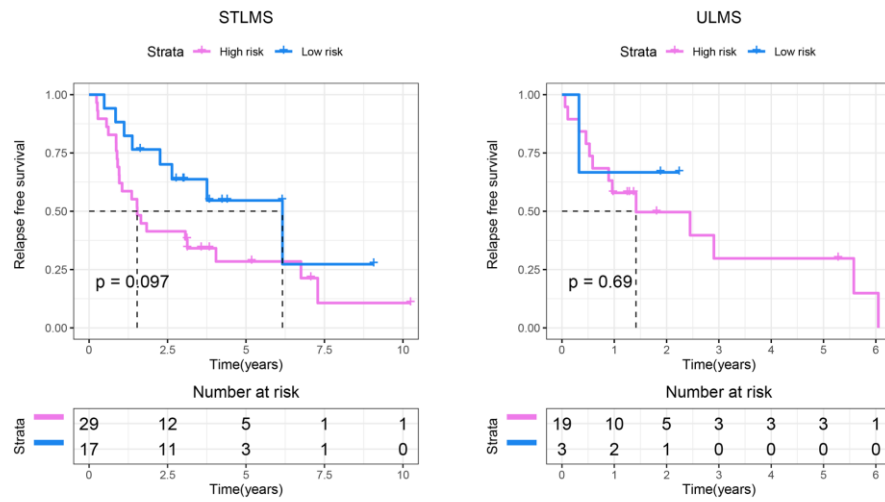

**Supplementary Figure S7. Kaplan–Meier analysis of OS (a) and RFS (b) for the four-gene signature in STLMS and ULMS.**

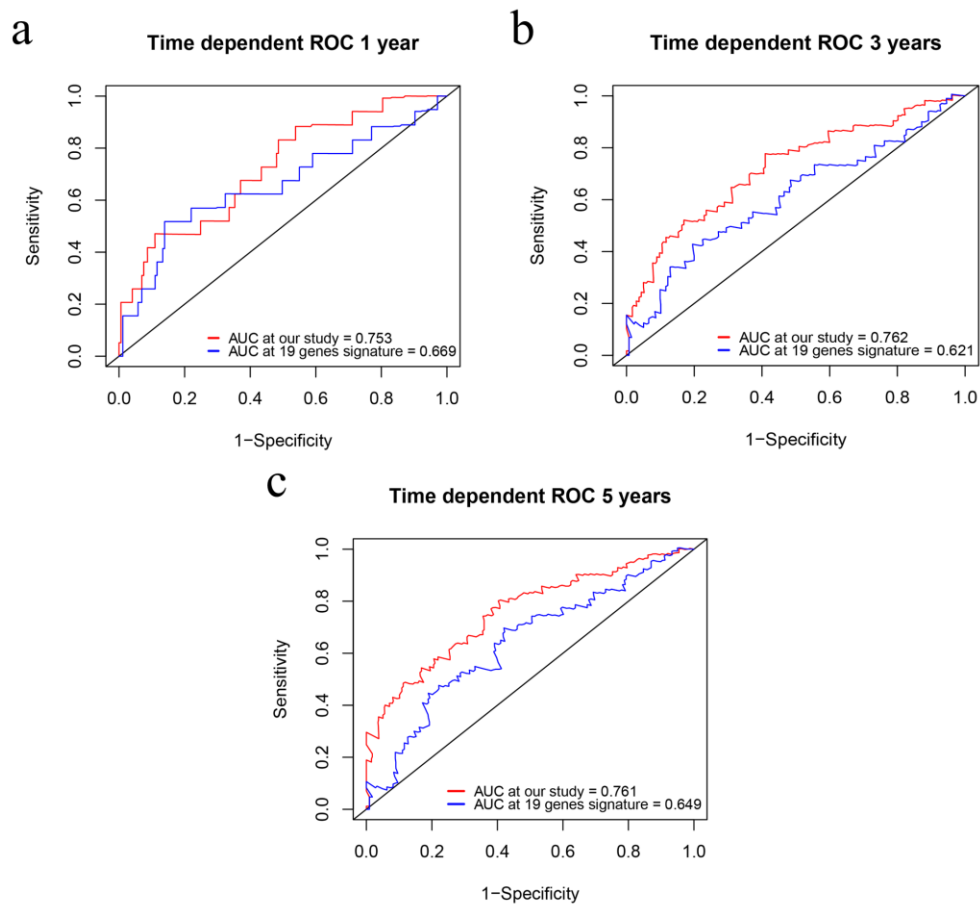

**Supplementary Figure S8. Comparison of our four-genes signature and 19 genes signature of Shen et al.**
